# Supplementary material for: Discrimination Learning, Reversal, and Set-Shifting in First-Episode Schizophrenia: Stability Over Six Years and Specific Associations with Medication Type and Disorganization Syndrome
Source: PubMed Central journal article supplement (PMC2734076; doi:10.1016/j.biopsych.2009.05.016), 2009-09-15
Supplement: mmc1.pdf [file mmc1.pdf]

**Supplemental Table 1.** Comparison of clinical and cognitive measures in those patients prescribed first- and second-generation antipsychotic medication.

| Measure                                 | Count or Mean (Standard deviation) |                                 | Comparison             |
|-----------------------------------------|------------------------------------|---------------------------------|------------------------|
|                                         | First-generation antipsychotic     | Second-generation antipsychotic |                        |
| Age at testing                          | 26.21 (8.73)                       | 25.42 (7.47)                    | F[1,232]=0.46, p=0.499 |
| Duration of untreated psychosis (weeks) | 50.21 (91.51)                      | 43.53 (79.87)                   | F[1,230]=0.29, p=0.592 |
| Negative syndrome                       | 0.36 (0.25)                        | 0.39 (0.27)                     | F[1,232]=0.55, p=0.460 |
| Positive syndrome                       | 0.72 (0.25)                        | 0.70 (0.24)                     | F[1,232]=0.31, p=0.580 |
| Disorganisation syndrome                | 0.40 (0.28)                        | 0.43 (0.31)                     | F[1,232]=0.67, p=0.416 |
| Social function                         | 110.10 (10.79)                     | 110.78 (11.04)                  | F[1,232]=0.14, p=0.706 |
| Premorbid IQ                            | 97.53 (14.91)                      | 95.02 (13.11)                   | F[1,220]=1.36, p=0.247 |
| Current IQ                              | 91.08 (16.60)                      | 86.78 (16.28)                   | F[1,226]=2.69, p=0.102 |
| Working memory span                     | 5.45 (1.38)                        | 5.40 (1.45)                     | F[1,230]=0.05, p=0.829 |
| Working memory manipulation             | 32.82 (21.51)                      | 34.68 (18.37)                   | F[1,232]=0.41, p=0.521 |
